# Supplementary material for: Ability of The Cardiorespiratory System to Adapt to Exercise is Impaired in Individuals With Severe Post-Stroke Fatigue
Source: Research Square preprint supplement (doi:10.21203/rs.3.rs-112240/v1), 2020-12-01
Supplement: Supplementary file 1 [file 2d451e903191b5305106c426.pdf]

1 *Supplementary Information*

2

3 **Ability of cardiorespiratory system to adapt to exercise is impaired in individuals with**  
4 **severe post-stroke fatigue**

5

6 Kazuaki Oyake, Yasuto Baba, Yuki Suda, PT, Jun Murayama, Ayumi Mochida,

7 Yuki Ito, Honoka Abe, Kunitsugu Kondo, Yohei Otaka, Kimito Momose

8

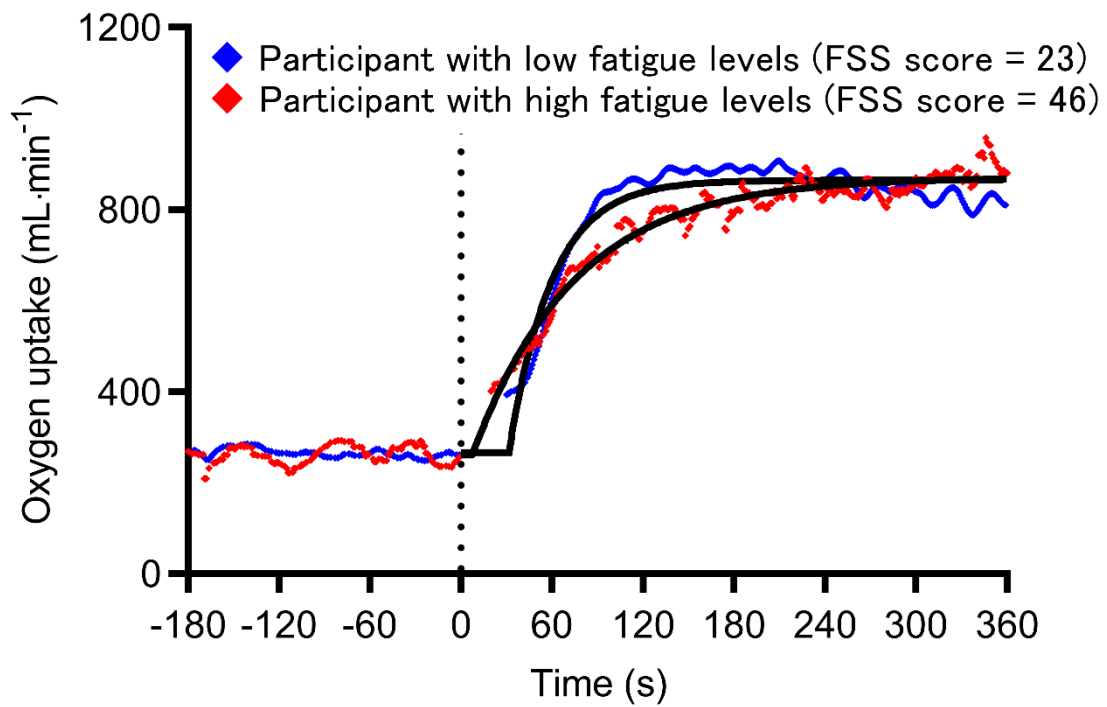

**Supplementary Figure S1:** Changes in oxygen consumption at the onset of exercise in a participant with low fatigue levels and a participant with high fatigue levels. Model fits on the data are displayed with a solid line. The vertical dashed line indicates the onset of exercise. The time constant and the coefficient of determination of oxygen uptake kinetics in the participant with low fatigue levels (◆) were 28.4 s and 0.99, respectively. The time constant and the coefficient of determination of oxygen uptake kinetics in the participant with high fatigue levels (◆) were 67.8 s and 0.99, respectively.

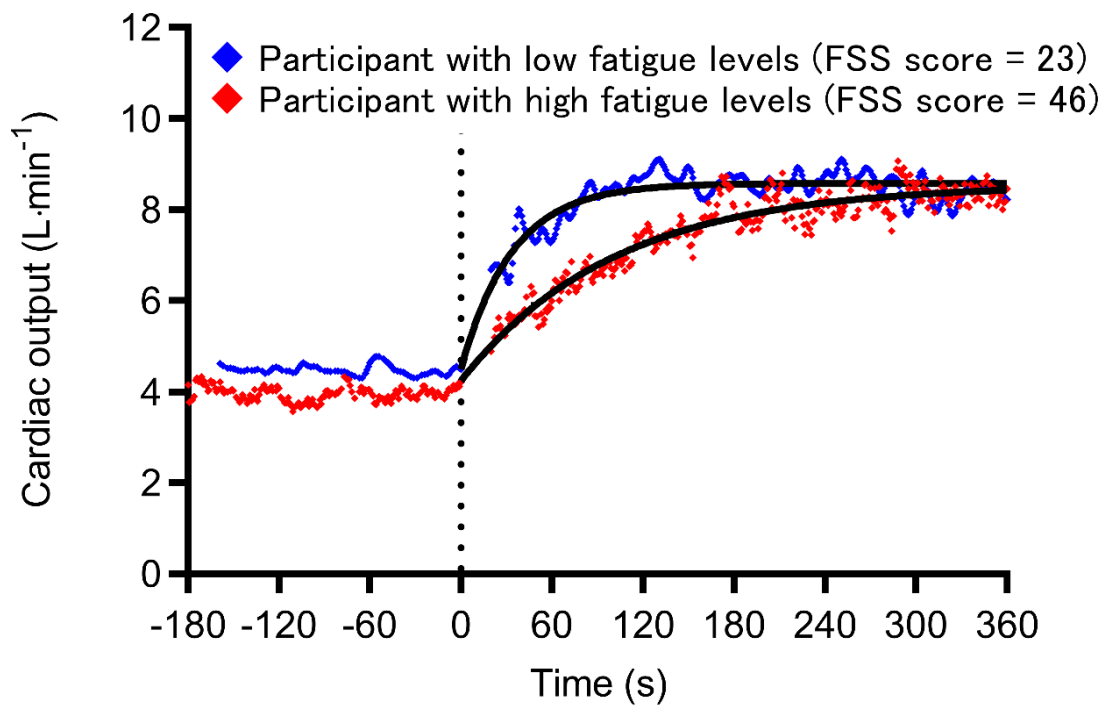

21

22 **Supplementary Figure S2:** Changes in cardiac output at the onset of exercise in a participant

23 with low fatigue levels and a participant with high fatigue levels. Model fits on the data are

24 displayed with a solid line. The vertical dashed line indicates the onset of exercise. The time

25 constant and the coefficient of determination of cardiac output kinetics in the participant with

26 low fatigue levels (◆) were 33.3 s and 0.96, respectively. The time constant and the coefficient

27 of determination of cardiac output kinetics in the participant with high fatigue levels (◆) were

28 91.6 s and 0.98, respectively.
